# Supplementary material
Source: PubMed Central journal article supplement (PMC2881630)
Supplement: supp_09-2661_Online_Supplement.pdf [file supp_09-2661_Online_Supplement.pdf]

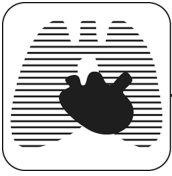

## Marital Status and the Epidemiology and Outcomes of Sepsis

*Christopher W. Seymour, MD; Theodore J. Iwashyna, MD, PhD; Colin R. Cooke, MD, MSc; Catherine L. Hough, MD, MSc; and Greg S. Martin, MD, MSc, FCCP*

**e-Table 1.** ICD-9-CM diagnosis and procedures codes used to define sepsis. Adapted from Martin et al.<sup>1</sup>

038 (septicemia), 020.0 (septicemic), 790.7 (bacteremia), 117.9 (disseminated fungal infection), 112.5 (disseminated candida infection), 112.81 (disseminated candida endocarditis, 995.91 (Systemic inflammatory response syndrome due to infectious process without acute organ dysfunction), 995.92 (severe sepsis), 785.52 (shock without mention of trauma; septic shock)

*Online supplements are not copyedited prior to posting.*



**e-Table 2.** ICD-9-CM diagnosis and procedures codes and Clinical Classifications Software (CCS) codes used to define additional co-morbidities<sup>30,31</sup>

Cancer: CCS 11-43

Human immunodeficiency virus positive: CCS 5

Congestive heart failure: 391.8, 398.9, 402.9, 425.0-425.7, 428.0-428.9, 429.3, 440.9, 648.6

Hypertension: 401.0, 401.1, 401.9

Chronic obstructive pulmonary disease: 490.x-496.x

Diabetes: CCS 49-50

*Online supplements are not copyedited prior to posting.*

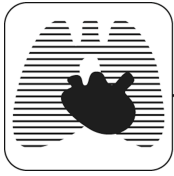

**e-Table 3.** ICD-9-CM diagnosis and procedures codes used to define source of sepsis <sup>1,4</sup>

Pulmonary: 010.0-011.9, 018, 034.0, 098.6, 461.0-513.9

Genitourinary: 098.17, 112.2, 590.0-616.9

Skin, soft tissue, or bone: 003.24, 015, 035, 036.82, 040.0, 095.5, 098.5, 680.0-686.9, 711.0-730.9

Gastrointestinal: 001.0-009.9, 129, 530.0-577.9

Central nervous system: 012.0, 036.0, 091.81, 094, 098.82, 320.0-326.9

Cardiovascular: 036.41-036.43, 093.0-093.82, 098.83-098.84, 391.2, 421.0-422.9

*Online supplements are not copyedited prior to posting.*



**e-Table 4.** ICD-9-CM diagnosis and procedures codes used to define acute organ dysfunction.<sup>1,32</sup>

Cardiovascular: 458.0, 785.5, 785.51, 785.59, 458.0, 458.8, 458.9, 796.3

Pulmonary: 518.81, 518.82, 518.85, 786.09, 799.1, 96.7

Renal: 584, 580, 585, 39.95

Neurological: 293, 348.1, 348.3, 780.01, 780.09, 89.14

Hepatic: 570, 572.2, 573.3

Hematologic: 286.2, 286.6, 286.9, 287.3-.5

*Online supplements are not copyedited prior to posting.*



**e-Table 5.** Adjusted incidence rate ratios for hospitalization for sepsis. Base model.

| Covariate           | Incidence rate ratio | 95% CI     | P value |
|---------------------|----------------------|------------|---------|
| Gender              |                      |            |         |
| Male                | 1                    | .          | .       |
| Female              | 0.80                 | 0.72, 0.88 | <0.01   |
| Race/Ethnicity      |                      |            |         |
| White, non-Hispanic | 1                    | .          | .       |
| Black, non-Hispanic | 2.0                  | 1.8, 2.3   | <0.01   |
| Hispanic            | 1.17                 | 1.05, 1.31 | <0.01   |
| Age                 | 1.46                 | 1.44, 1.48 | <0.01   |
| Marital status      |                      |            |         |
| Married             | 1                    | .          | .       |
| Divorced            | 0.94                 | 0.83, 1.06 | 0.33    |
| Widowed             | 1.38                 | 1.17, 1.62 | <0.01   |
| Legally separated   | 1.46                 | 1.20, 1.77 | <0.01   |
| Single              | 3.47                 | 3.09, 3.9  | <0.01   |

*Online supplements are not copyedited prior to posting.*



**e-Table 6.** Adjusted incidence rate ratios for hospitalization for sepsis. Sensitivity analysis 1, Alternative case definition: sepsis as ICD-9 CM = "995.91" only

| Covariate           | Incidence rate ratio | 95% CI     | P value |
|---------------------|----------------------|------------|---------|
| Gender              |                      |            |         |
| Male                | 1.0 [ref]            | .          | .       |
| Female              | 0.85                 | 0.77, 0.93 | <0.01   |
| Race/Ethnicity      |                      |            |         |
| White, non-Hispanic | 1.0 [ref]            | .          | .       |
| Black, non-Hispanic | 2.05                 | 1.87, 2.27 | <0.01   |
| Hispanic            | 1.34                 | 1.18, 1.53 | <0.01   |
| Age                 | 1.46                 | 1.43, 1.48 | <0.01   |
| Marital status      |                      |            |         |
| Married             | 1.0 [ref]            | .          | .       |
| Divorced            | 0.92                 | 0.81, 1.05 | 0.23    |
| Widowed             | 1.21                 | 1.05, 1.40 | <0.01   |
| Legally separated   | 1.32                 | 1.06, 1.64 | 0.01    |
| Single              | 3.3                  | 2.92, 3.7  | <0.01   |

*Online supplements are not copyedited prior to posting.*



**e-Table 7.** Adjusted incidence rate ratios for hospitalization for sepsis. Sensitivity analysis 2, Alternative numerator: excluding hospitalizations coded as re-admissions

| Covariate           | Incidence rate ratio | 95% CI     | P value |
|---------------------|----------------------|------------|---------|
| Gender              |                      |            |         |
| Male                | 1 [ref]              | .          | .       |
| Female              | 0.81                 | 0.73, 0.89 | <0.01   |
| Race/Ethnicity      |                      |            |         |
| White, non-Hispanic | 1 [ref]              | .          | .       |
| Black, non-Hispanic | 2.05                 | 1.84, 2.27 | <0.01   |
| Hispanic            | 1.19                 | 1.06, 1.32 | <0.01   |
| Age                 | 1.46                 | 1.44, 1.49 | <0.01   |
| Marital status      |                      |            |         |
| Married             | 1 [ref]              | .          | .       |
| Divorced            | 0.95                 | 0.84, 1.06 | 0.37    |
| Widowed             | 1.35                 | 1.16, 1.59 | <0.01   |
| Legally separated   | 1.46                 | 1.21, 1.78 | <0.01   |
| Single              | 3.56                 | 3.17, 3.99 | <0.01   |

*Online supplements are not copyedited prior to posting.*



**e-Table 8.** Adjusted incidence rate ratios for hospitalization for sepsis. Sensitivity analysis 3, Alternative denominator: excluding "Married: spouse absent" from married

| Covariate           | Incidence rate ratio | 95% CI     | P value |
|---------------------|----------------------|------------|---------|
| Gender              |                      |            |         |
| Male                | 1 [ref]              | .          | .       |
| Female              | 0.81                 | 0.73, 0.89 | <0.001  |
| Race/Ethnicity      |                      |            |         |
| White, non-Hispanic | 1 [ref]              | .          | .       |
| Black, non-Hispanic | 2.09                 | 1.87, 2.34 | <0.01   |
| Hispanic            | 1.19                 | 1.07, 1.34 | <0.01   |
| Age                 | 1.46                 | 1.44, 1.48 | <0.01   |
| Marital status      |                      |            |         |
| Married             | 1 [ref]              | .          | .       |
| Divorced            | 0.86                 | 0.75, 0.97 | 0.02    |
| Widowed             | 1.25                 | 1.06, 1.48 | <0.01   |
| Legally separated   | 1.32                 | 1.09, 1.6  | <0.01   |
| Single              | 3.14                 | 2.79, 3.54 | <0.01   |

*Online supplements are not copyedited prior to posting.*





**e-Table 9.** Adjusted incidence rate ratios for hospitalization for sepsis. Sensitivity analysis 4, Alternative denominator: US Census 2000 population

| Covariate           | Incidence rate ratio | 95% CI     | P value |
|---------------------|----------------------|------------|---------|
| Gender              |                      |            |         |
| Male                | 1 [ref]              | .          | .       |
| Female              | 0.75                 | 0.69, 0.82 | <0.01   |
| Race/Ethnicity      |                      |            |         |
| White, non-Hispanic | 1 [ref]              | .          | .       |
| Black, non-Hispanic | 2.21                 | 2.0, 2.43  | <0.01   |
| Hispanic            | 1.62                 | 1.47, 1.80 | <0.01   |
| Age                 | 1.50                 | 1.48, 1.53 | <0.01   |
| Marital status      |                      |            |         |
| Married             | 1 [ref]              | .          | .       |
| Divorced            | 1.18                 | 1.06, 1.30 | <0.01   |
| Widowed             | 1.35                 | 1.18, 1.55 | <0.01   |
| Legally separated   | 1.38                 | 1.22, 1.55 | <0.01   |
| Single              | 4.81                 | 4.24, 5.46 | <0.01   |

*Online supplements are not copyedited prior to posting.*

**e-Table 10.** Multivariable logistic regression model for in-hospital mortality among hospitalizations for sepsis: Sensitivity analysis 1: Model B + re-admission

| Covariate                              | Odds Ratio [95% CI] | P value |
|----------------------------------------|---------------------|---------|
| Female                                 |                     |         |
| Married                                | 0.94 [0.87, 1.03]   | 0.24    |
| Divorced                               | 0.8 [0.66, 1.0]     | 0.06    |
| Widowed                                | 1.0 [0.91, 1.1]     | 0.95    |
| Single                                 | 1.24 [1.1, 1.4]     | <0.01   |
| Legally separated                      | 0.95 [0.65, 1.38]   | 0.8     |
| Male                                   |                     |         |
| Married                                | 1.0 [ref]           | .       |
| Divorced                               | 1.28 [1.06, 1.55]   | <0.01   |
| Widowed                                | 0.98 [0.89, 1.09]   | 0.76    |
| Single                                 | 1.14 [1.00, 1.29]   | 0.04    |
| Legally separated                      | 1.17 [0.8, 1.6]     | 0.37    |
| Age, yrs                               | 1.03 [1.03, 1.03]   | <0.01   |
| Race/Ethnicity                         |                     |         |
| White, non-Hispanic                    | 1.0 [ref]           | .       |
| Black, non-Hispanic                    | 0.84 [0.78, 0.92]   | <0.01   |
| Hispanic                               | 0.79 [0.66, 0.95]   | 0.01    |
| Urbanicity                             |                     |         |
| Non-metropolitan                       | 1.0 [ref]           | .       |
| Metropolitan                           | 0.92 [0.74, 1.13]   | 0.4     |
| Quartile of median income by zip code: |                     |         |
| Lowest                                 | 1.0 [ref]           | .       |
| 2 <sup>nd</sup>                        | 1.02 [0.88, 1.19]   | 0.72    |
| 3 <sup>rd</sup>                        | 0.97 [0.86, 1.09]   | 0.6     |
| Highest                                | 1.01 [0.9, 1.13]    | 0.85    |
| Payer:                                 |                     |         |
| Primary: Medicaid                      | 1.07 [0.9, 1.26]    | 0.43    |
| Secondary: Medicaid                    | 0.86 [0.79, 0.95]   | <0.01   |
| Charlson-Deyo score                    | 1.12 [1.00, 1.29]   | 0.04    |
| Re-admission hospitalization           | 1.14 [1.01, 1.3]    | 0.04    |

Abbreviations: OR = odds ratio

*Online supplements are not copyedited prior to posting.*

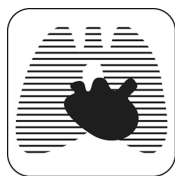**e-Table 11.** Multivariable logistic regression model for in-hospital mortality among hospitalizations for sepsis: Sensitivity analysis 2: Model B + source of sepsis + gram positive pathogen

| Covariate                              | Odds ratio [95% CI] | P value |
|----------------------------------------|---------------------|---------|
| Female                                 |                     |         |
| Married                                | 1.0 [0.92, 1.08]    | 0.91    |
| Divorced                               | 0.88 [0.73, 1.06]   | 0.2     |
| Widowed                                | 1.02 [0.94, 1.1]    | 0.64    |
| Single                                 | 1.16 [1.03, 1.3]    | <0.01   |
| Legally separated                      | 0.93 [0.71, 1.24]   | 0.67    |
| Male                                   |                     |         |
| Married                                | 1.0 [ref]           | .       |
| Divorced                               | 1.21 [1.05, 1.42]   | 0.01    |
| Widowed                                | 1.02 [0.94, 1.12]   | 0.61    |
| Single                                 | 1.15 [1.05, 1.25]   | <0.01   |
| Legally separated                      | 1.19 [0.9, 1.56]    | 0.21    |
| Age, yrs                               | 1.03 [1.03, 1.03]   | <0.01   |
| Race/Ethnicity                         |                     |         |
| White, non-Hispanic                    | 1.0 [ref]           | .       |
| Black, non-Hispanic                    | 0.86 [0.79, 0.94]   | <0.01   |
| Hispanic                               | 0.84 [0.72, 0.95]   | <0.01   |
| Urbanicity                             |                     |         |
| Non-metropolitan                       | 1.0 [ref]           | .       |
| Metropolitan                           | 0.93 [0.80, 1.08]   | 0.37    |
| Quartile of median income by zip code: |                     |         |
| Lowest                                 | 1.0 [ref]           | .       |
| 2nd                                    | 0.98 [0.87, 1.11]   | 0.81    |
| 3rd                                    | 0.98 [0.89, 1.08]   | 0.76    |
| Highest                                | 1.0 [0.9, 1.1]      | 0.99    |
| Payer:                                 |                     |         |
| Primary: Medicaid                      | 1.01 [0.87, 1.17]   | 0.85    |
| Secondary: Medicaid                    | 0.90 [0.83, 0.97]   | <0.01   |
| Charlson-Deyo score                    | 1.08 [1.07, 1.1]    | <0.01   |
| Gram positive infection                | 0.79 [0.71, 0.87]   | <0.01   |
| Source of sepsis                       |                     |         |
| Respiratory                            | 1.37 [1.28, 1.46]   | <0.01   |
| CNS                                    | 1.04 [0.7, 1.52]    | 0.85    |
| Gastrointestinal                       | 1.14 [1.07, 1.23]   | <0.01   |
| Skin, soft tissue, joint               | 0.44 [0.39, 0.49]   | <0.01   |
| Cardiovascular                         | 0.74 [0.59, 0.92]   | <0.01   |
| Urological                             | 0.47 [0.44, 0.51]   | <0.01   |

Abbreviations: OR = odds ratio

*Online supplements are not copyedited prior to posting.*
